# Supplementary material
Source: HighWire-hosted journal article supplement (http://molpharm.aspetjournals.org/highwire/filestream/77442/field_highwire_adjunct_files/0/Supplemental_100792.pdf)
Supplement: Supplemental_100792.pdf [file Supplemental_100792.pdf]

Supplemental Figures to:

## **Identification and validation of larixyl acetate as a potent TRPC6 inhibitor**

Nicole Urban, Liming Wang, Sandra Kwiek, Jörg Rademann,  
Wolfgang M. Kuebler, and Michael Schaefer

**Molecular Pharmacology**

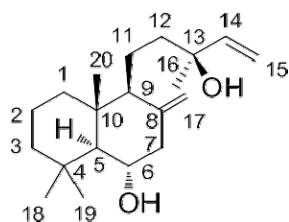

### Supplemental Figure 1: Structure and chemical characterisation of Larixol

$R_f = 0.02$  (Hexan: EE 9:1 (v:v))

$T_m = 100^\circ\text{C}$

**$^1\text{H-NMR}$**  (300 MHz,  $\text{CDCl}_3$ )  $\delta$  [ppm] = 0.68 (s, 3H, 20- $\text{CH}_3$ ), 0.99 (s, 3H, 18/19- $\text{CH}_3$ ), 1.01-1.60 (m, 12H), 1.16 (s, 3H, 18/19- $\text{CH}_3$ ), 1.13 (d, 1H, 5- $\text{CH}$ ), 1.26 (s, 3H, 16- $\text{CH}_3$ ), 2.04 (t, 1H, 7- $\text{CH}$ ), 2.66 (dd, 1H, 7- $\text{CH}$ ), 3.82 (dt, 1H, 6- $\text{CH}$ ), 4.65 (dd, 2H, 17- $\text{CH}_2$ ), 5.04 (dd, 1H, 15- $\text{CH}$ ,  $J_{\text{cis}} = 10.37$  Hz,  $J_{\text{geminal}} = 1.26$  Hz), 5.18 (dd, 1H, 15- $\text{CH}$ ,  $J_{\text{trans}} = 17.37$  Hz,  $J_{\text{geminal}} = 1.26$  Hz), 5.89 (dd, 1H, 14- $\text{CH}$ ,  $J_{\text{trans}} = 17.37$  Hz,  $J_{\text{cis}} = 10.37$  Hz)

**$^{13}\text{C-NMR}$**  (75 MHz,  $\text{CDCl}_3$ )  $\delta$  [ppm] = 16.3 (20- $\text{CH}_3$ ), 18.3 (11- $\text{CH}_2$ ), 19.4 (2- $\text{CH}_2$ ), 22.6 (18/19- $\text{CH}_3$ ), 28.0 (16- $\text{CH}_3$ ), 34.1 (4- $\text{C}$ ), 36.9 (18/19- $\text{CH}_3$ ), 39.6 (1- $\text{CH}_2$ ), 39.8 (10- $\text{CH}_2$ ), 41.6 (12- $\text{CH}_2$ ), 44.0 (3- $\text{CH}_2$ ), 49.4 (7- $\text{CH}_2$ ), 56.7 (9- $\text{CH}$ ), 60.8 (5- $\text{CH}$ ), 71.9 (6- $\text{CH}$ ), 73.8 (13- $\text{C}$ ), 108.6 (17- $\text{CH}_2$ ), 111.9 (15- $\text{CH}_2$ ), 145.4 (14- $\text{CH}$ ), 145.8 (8- $\text{C}$ )

**HRMS**  $[\text{M}+\text{Na}^+]$  calculated 329.24565 Da, found 329.24510 m/z.

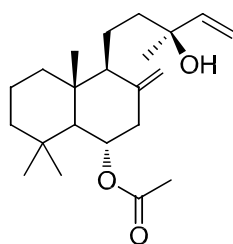

**Supplemental Figure 2: Structure and chemical characterisation of larix-6-yl monoacetate**

$R_f = 0.30$  (Hexan: EE 4:1(v:v))

**$^1\text{H-NMR}$**  (300 MHz,  $\text{CDCl}_3$ )  $\delta$  [ppm] = 0.73 (s, 3H, 20- $\text{CH}_3$ ), 0.83 (s, 3H, 18/19- $\text{CH}_3$ ), 1.00 (s, 3H, 18/19- $\text{CH}_3$ ), 1.03-1.80 (m, 12H), 1.26 (s, 3H, 16- $\text{CH}_3$ ), 1.40 (d, 1H, 5- $\text{CH}$ ), 2.02 (s, 3H, Ac- $\text{CH}_3$ ), 2.66 (dd, 1H, 7- $\text{CH}$ ), 4.63 (m, 1H, 17- $\text{CH}_2$ ), 4.91 (m, 1H, 17- $\text{CH}_2$ ), 4.97-5.06 (m, 2H), 5.19 (dd, 1H, 15- $\text{CH}$ ), 5.89 (dd, 1H, 14- $\text{CH}$ )

**$^{13}\text{C-NMR}$**  (75 MHz,  $\text{CDCl}_3$ )  $\delta$  [ppm] = 16.2 (20- $\text{CH}_3$ ), 18.2 (11- $\text{CH}_2$ ), 19.2 (2- $\text{CH}_2$ ), 22.2 (Ac- $\text{CH}_3$ ), 22.7 (18/19- $\text{CH}_3$ ), 28.0 (16- $\text{CH}_3$ ), 33.7 (4- $\text{C}$ ), 36.4 (18/19- $\text{CH}_3$ ), 39.3 (1- $\text{CH}_2$ ), 40.1 (10- $\text{CH}_2$ ), 41.5 (12- $\text{CH}_2$ ), 43.7 (3- $\text{CH}_2$ ), 44.4 (7- $\text{CH}_2$ ), 56.6 (9- $\text{CH}$ ), 57.8 (5- $\text{CH}$ ), 73.5 (6- $\text{CH}$ ), 73.7 (13- $\text{C}$ ), 109.7 (17- $\text{CH}_2$ ), 111.9 (15- $\text{CH}_2$ ), 144.5 (14- $\text{CH}$ ), 145.4 (8- $\text{C}$ ), 170.3 (Ac- $\text{CO}$ )

**HRMS** [ $\text{M}+\text{Na}^+$ ] calculated 371.25621 Da, found 371.25567 m/z

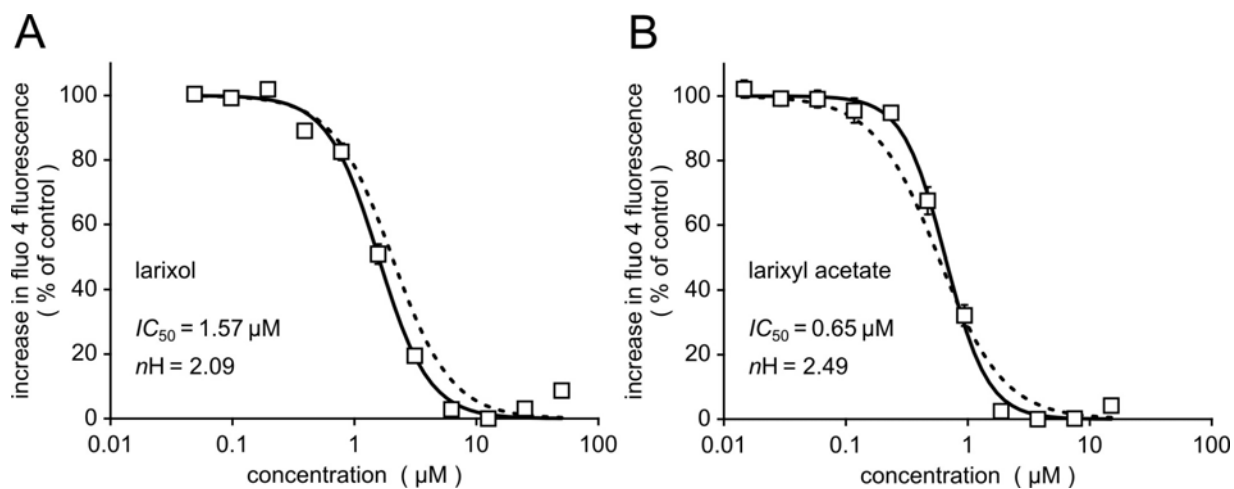

**Supplemental Figure 3: Potency of larixol and larixyl acetate to inhibit  $\text{Ca}^{2+}$  entry through TRPC6 in the receptor-induced mode of activation.**

To assess whether the TRPC6 inhibitors are effective when TRPC6 is activated in a receptor-mediated fashion, fluo-4-loaded HEK<sub>hTRPC6</sub> cells were preincubated for 5 min with 2  $\mu\text{M}$  thapsigargin in the presence of various concentrations of larixol (A) or larixyl acetate (B), and then stimulated with ATP (300  $\mu\text{M}$ ), carbachol (1 mM), and thrombin (0.5 U/ml) to induce activation of endogenous phospholipase C. Concentration-response curves were fitted to a four parameter Hill equation, and resulting  $IC_{50}$  and Hill coefficients are indicated. For comparison, the concentration response curve of TRPC6 inhibition in the OAG-activated mode (Fig. 3D,E of the main manuscript) is superimposed as dashed lines.

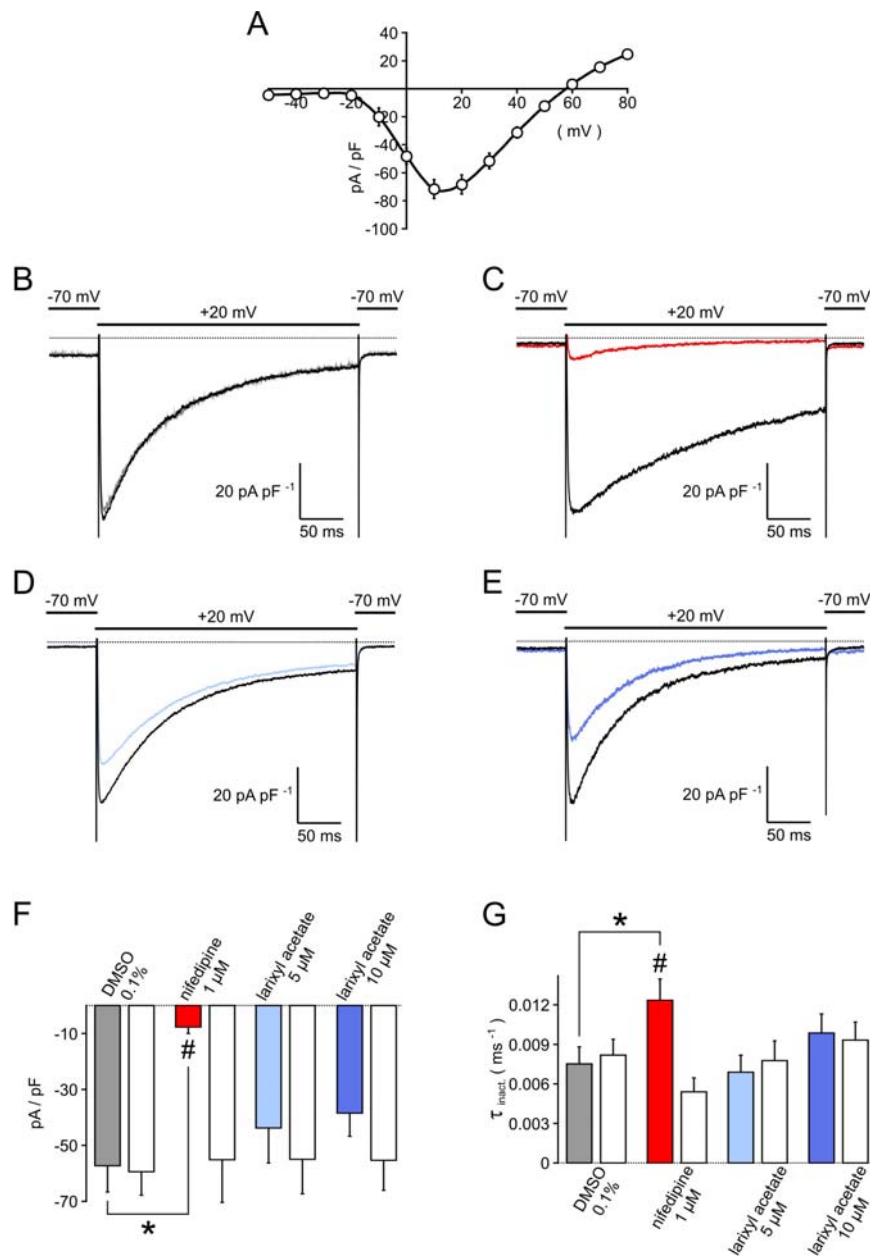

#### Supplemental Figure 4: Effect of larixyl acetate on voltage-gated $\text{Ca}^{2+}$ channels ( $\text{Ca}_V1.2$ ).

HEK293 cells were transiently transfected with expression plasmids encoding the  $\alpha_{1c77}$ , the  $\beta_{2a}$ , and the  $\alpha_{2\delta}$  subunits of  $\text{Ca}_V1.2$  along with a yellow fluorescent protein as transfection marker. (A)  $\text{Ba}^{2+}$  currents through recombinant  $\text{Ca}_V1.2$  channels were measured in voltage step protocols, after stepping from a holding potential of  $-70$  mV to the indicated voltages. Shown are means and S.E. of peak current amplitudes determined in 20 patched cells. (B-E) Superposition of depolarisation-induced  $\text{Ba}^{2+}$  currents in the presence of the indicated modulators, and 160 s after their wash-out (black lines). (F,G) Statistical analysis of modulator effects on peak current densities (F) and on inactivation time constants  $\tau_{inact}$  (monoexponential fits; G) calculated from 6-9 experiments performed as shown in (B-E). Filled bars: values in the presence of the indicated modulators; open bars: values after wash-out of the respective modulator.
